# Supplementary material for: Loss of mitochondrial Ca2+ response and CaMKII/ERK activation by LRRK2R1441G mutation correlate with impaired depolarization-induced mitophagy
Source: PubMed Central journal article supplement — Cell Commun Signal. 2024 Oct 10;22:485. doi: 10.1186/s12964-024-01844-y (PMC11465656; doi:10.1186/s12964-024-01844-y), 2024-10-10

Supplementary File: Original Western Blots

**Fig. 4D:**

NCLX:

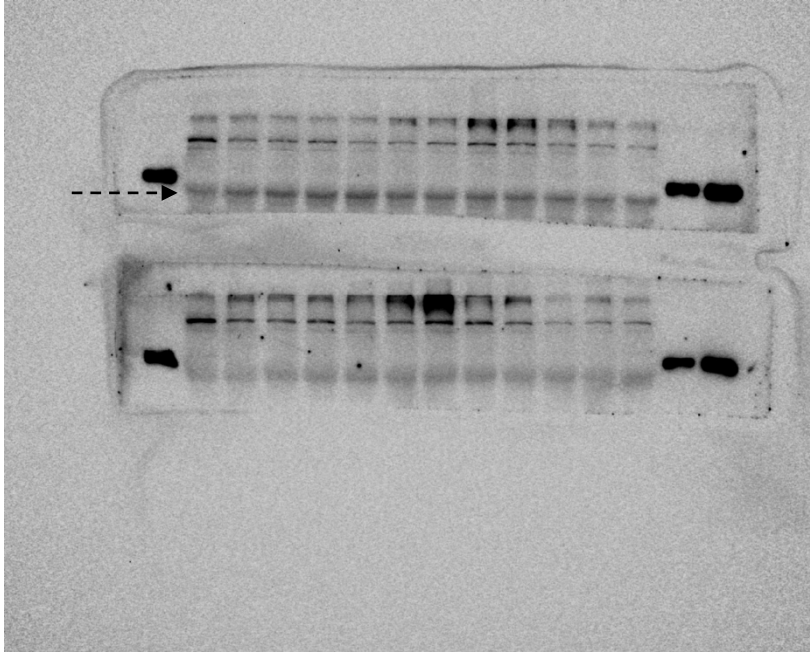

MCU:

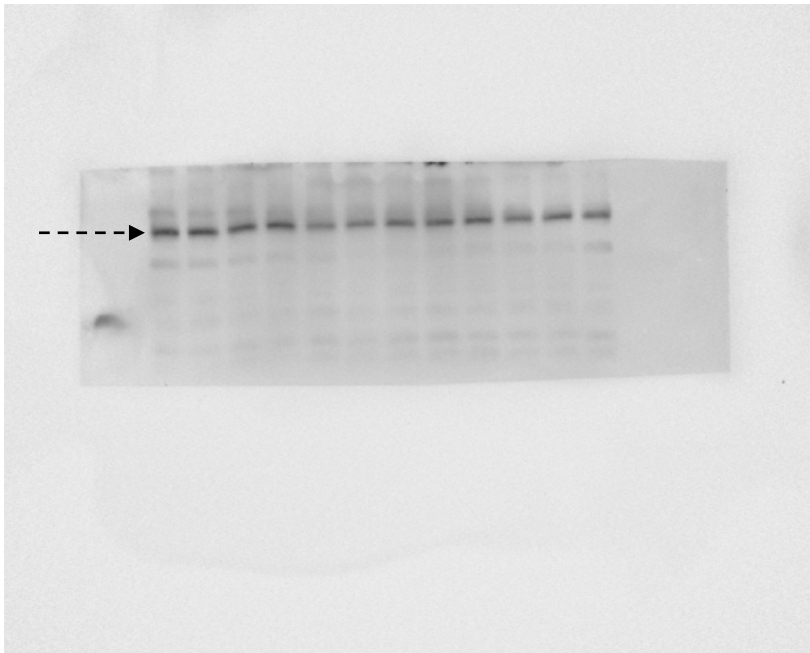

COX4:

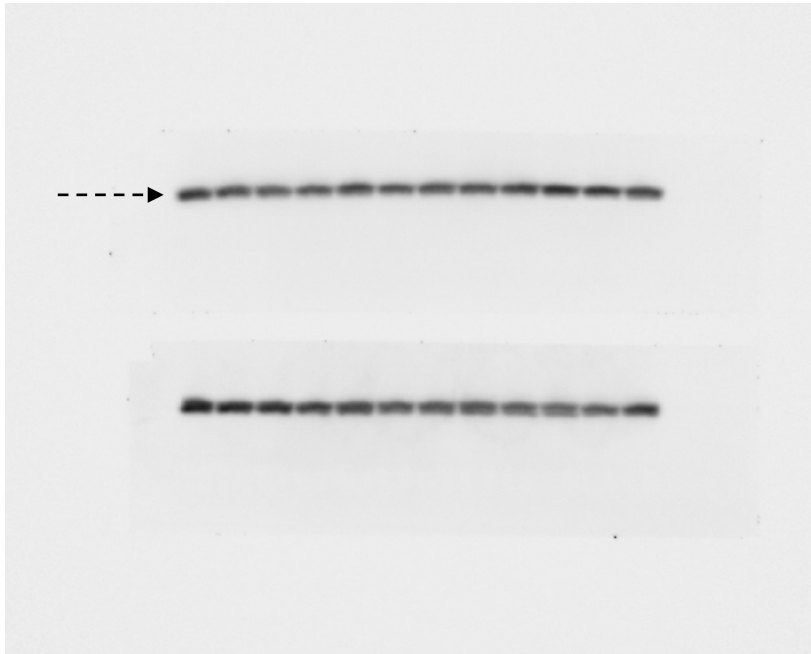

Actin:

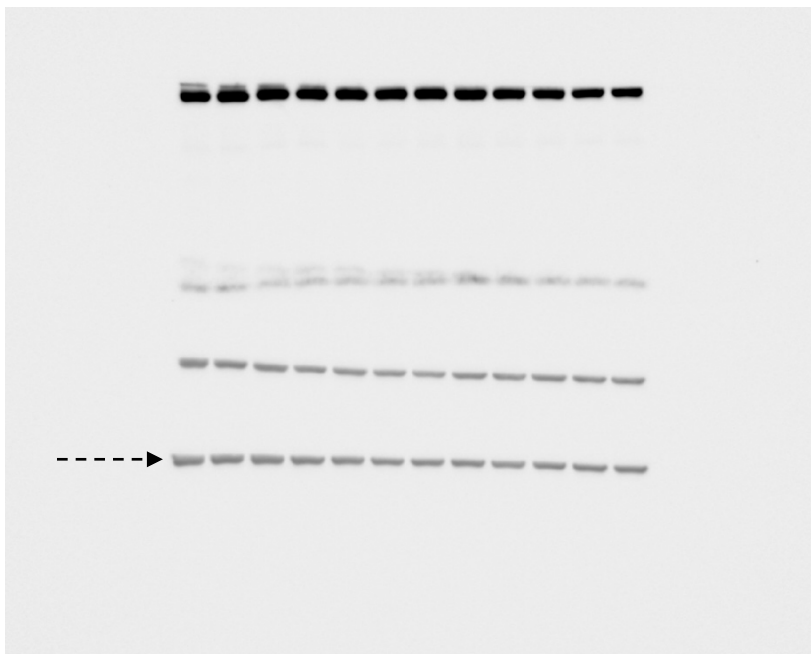

**Fig. 5A**

p-CaMKII:

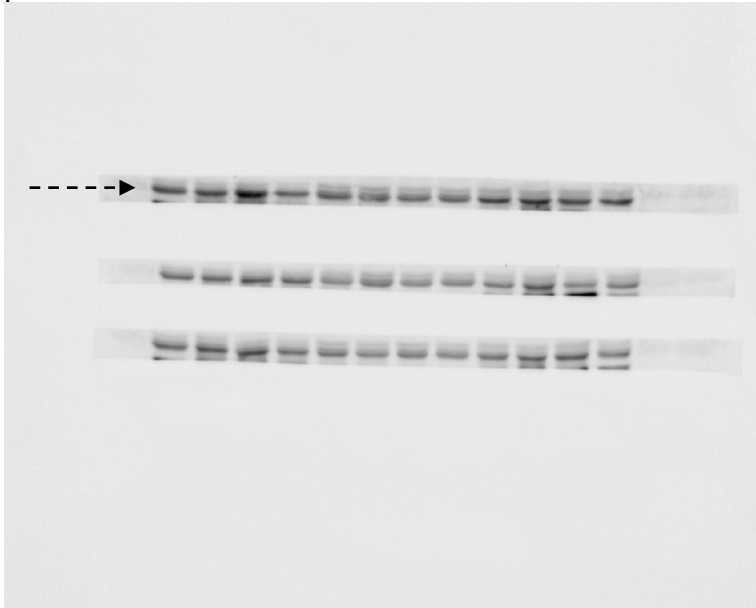

Total CaMKII:

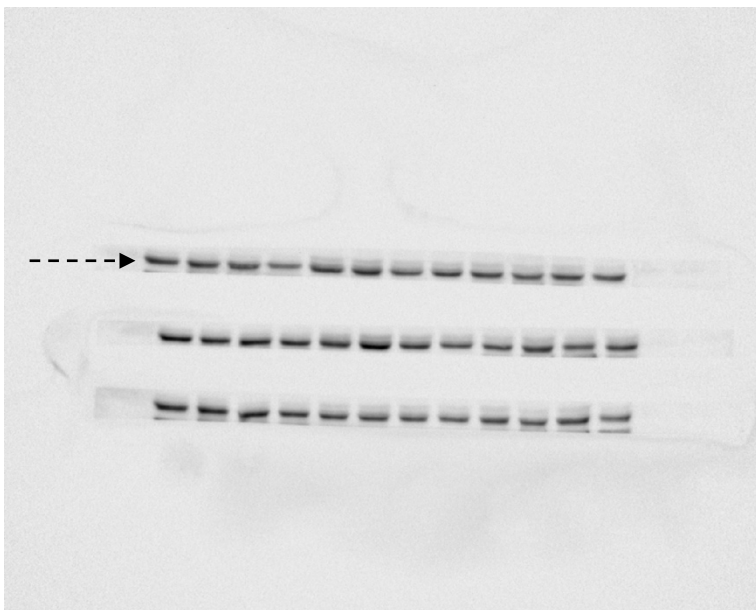

p-MEK:

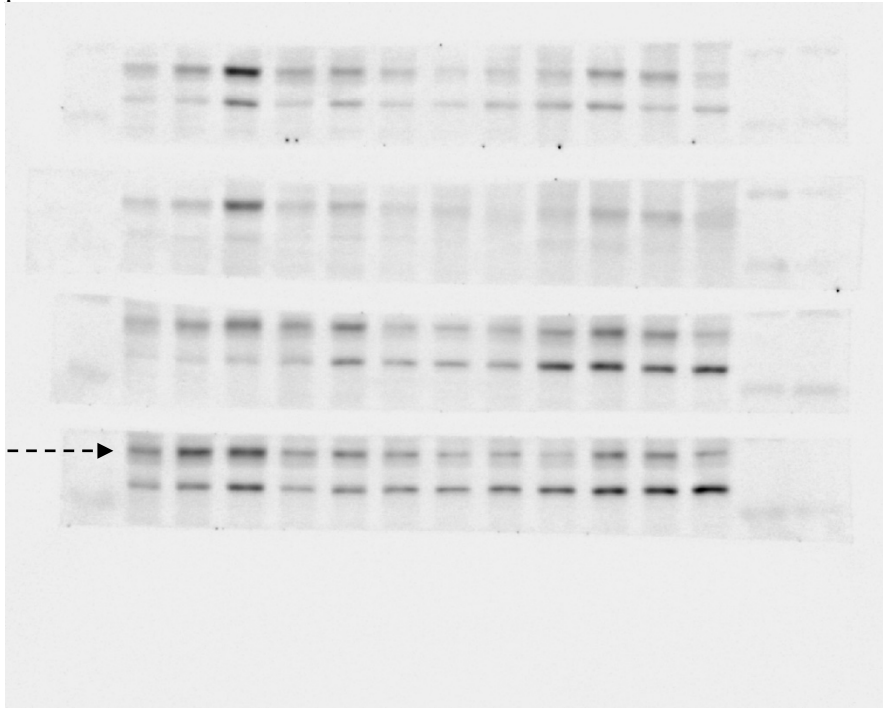

Total MEK:

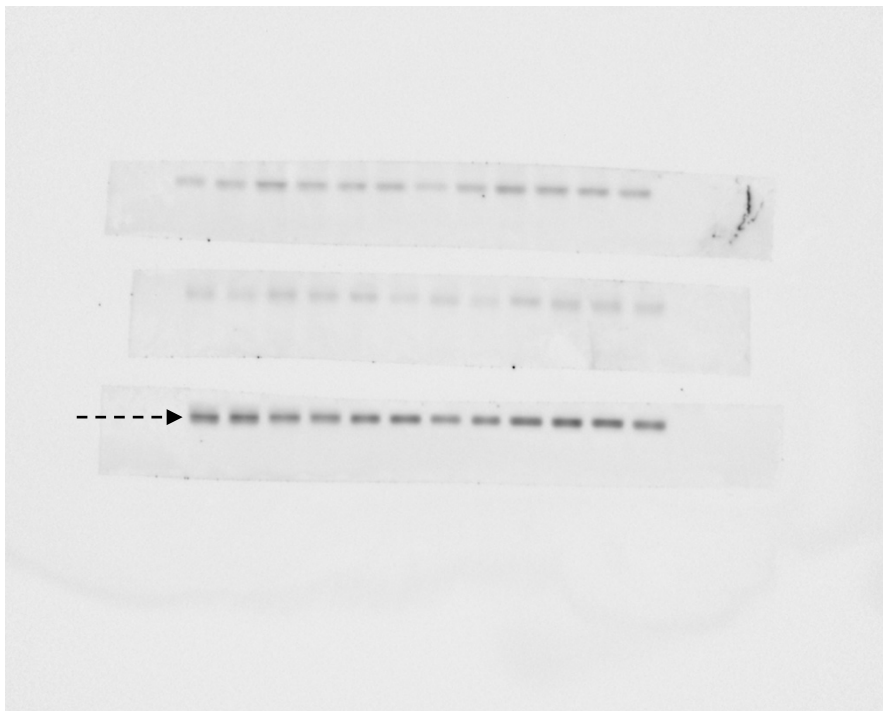

p-ERK:

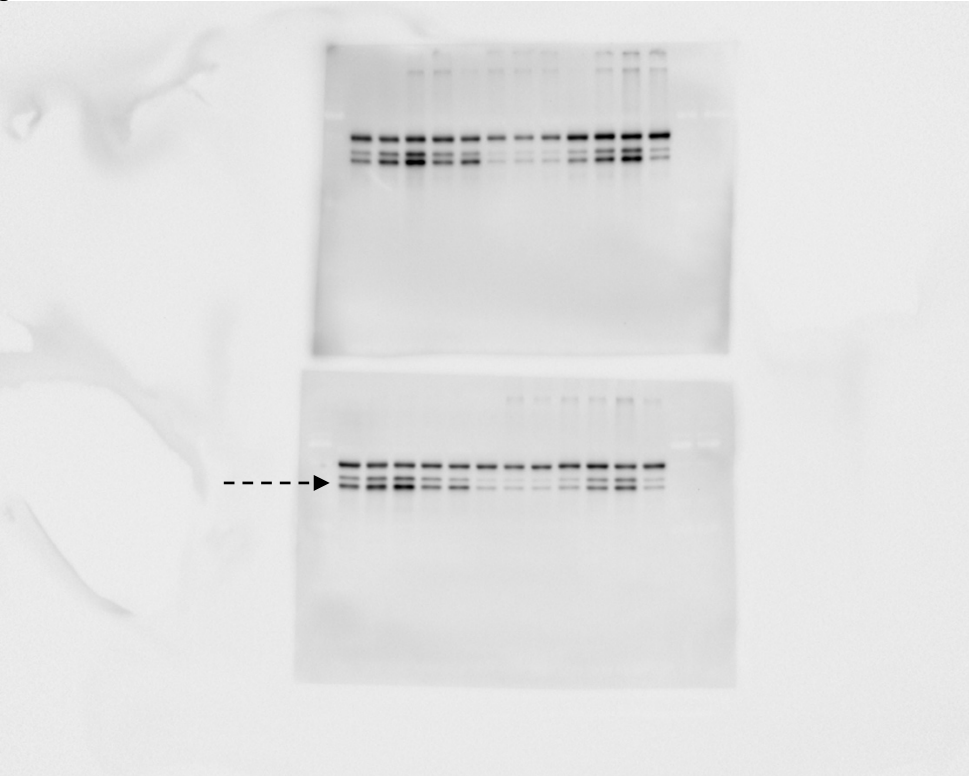

Total ERK:

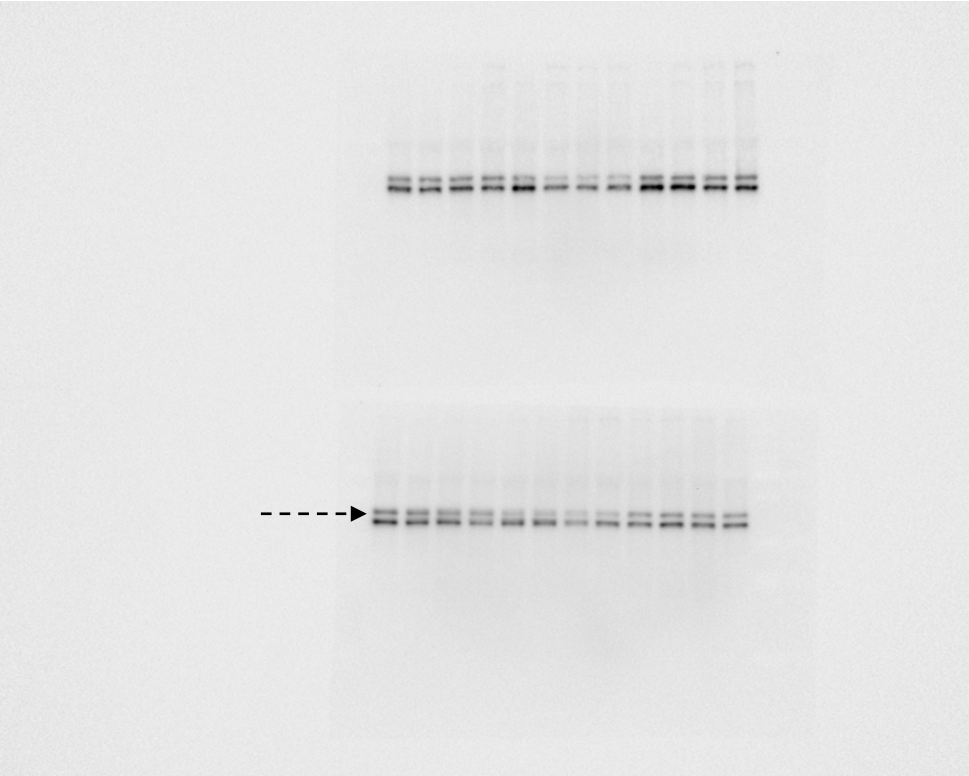

pSer616-Drp1:

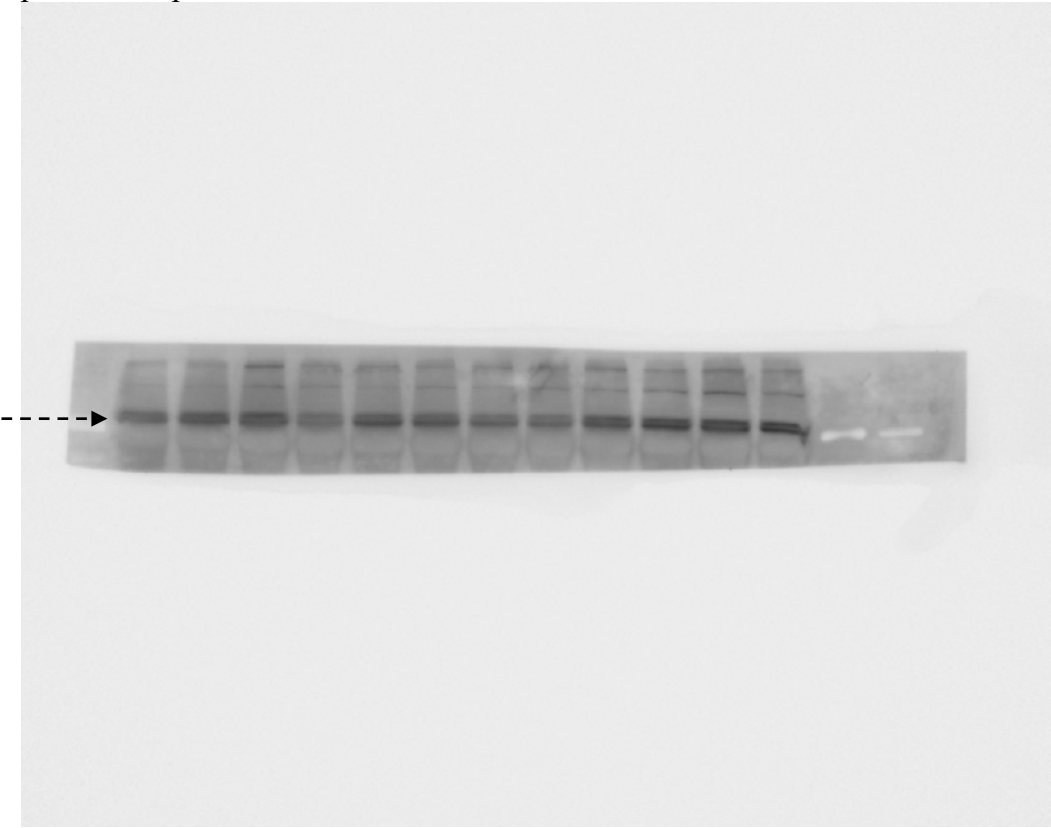

Total Drp1:

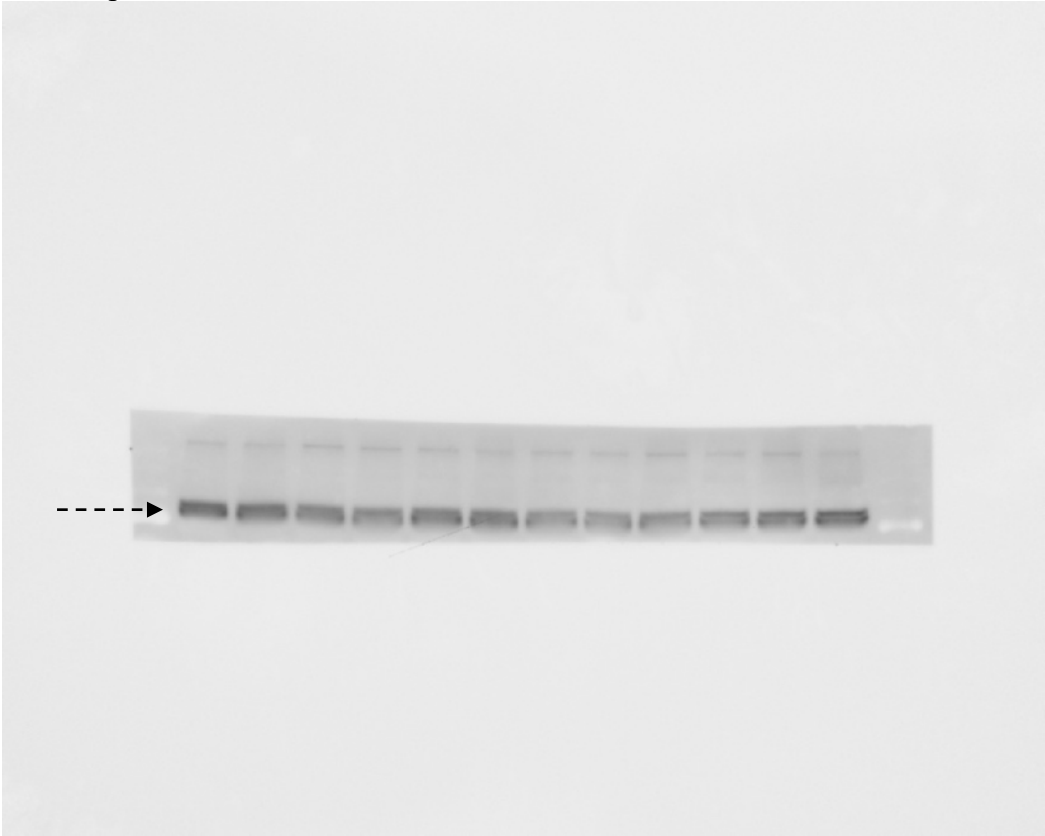

**a-tubulin:**

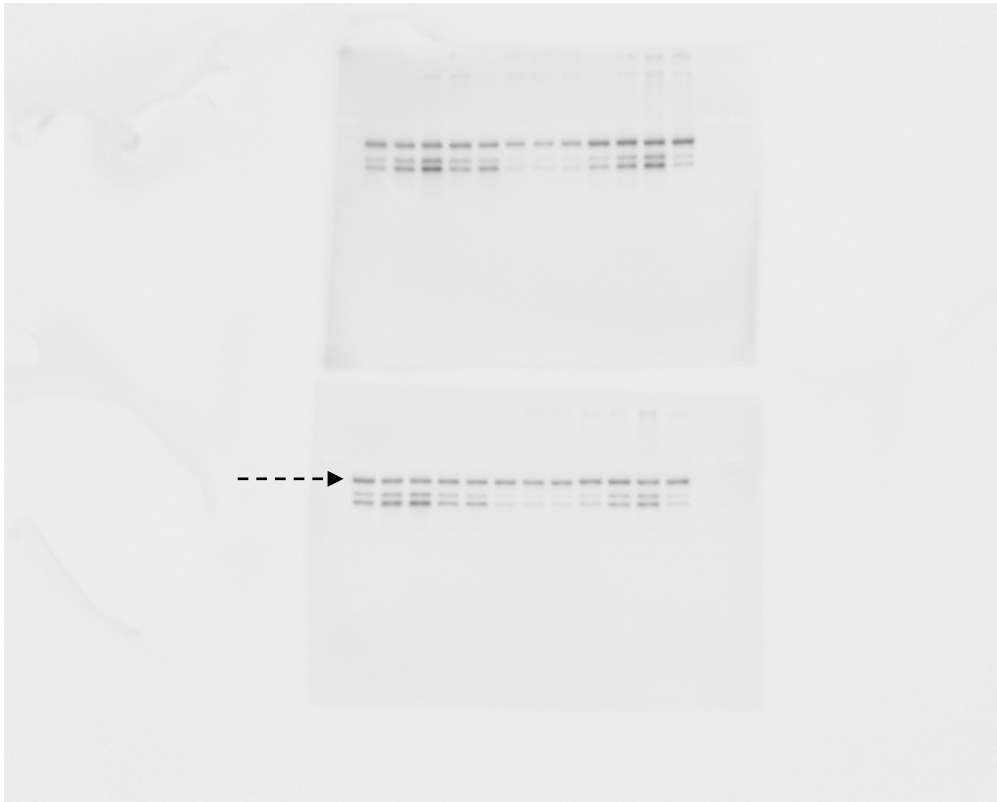

**Fig. 5H**

p-Rab10 (Thr73):

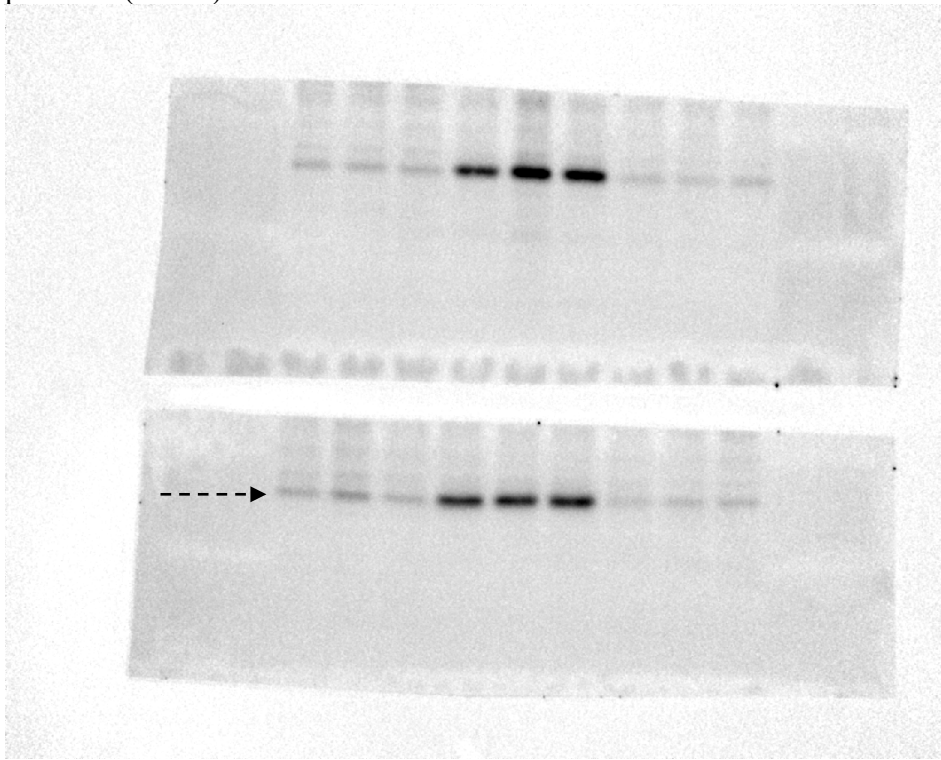

Total Rab10:

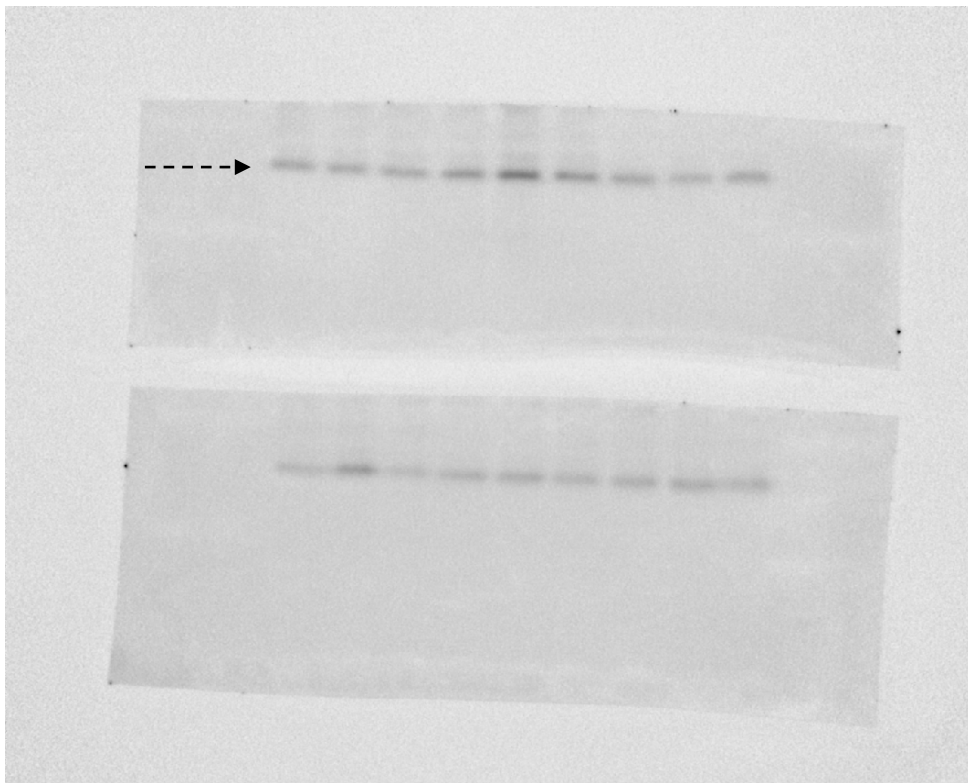



p-MEK:

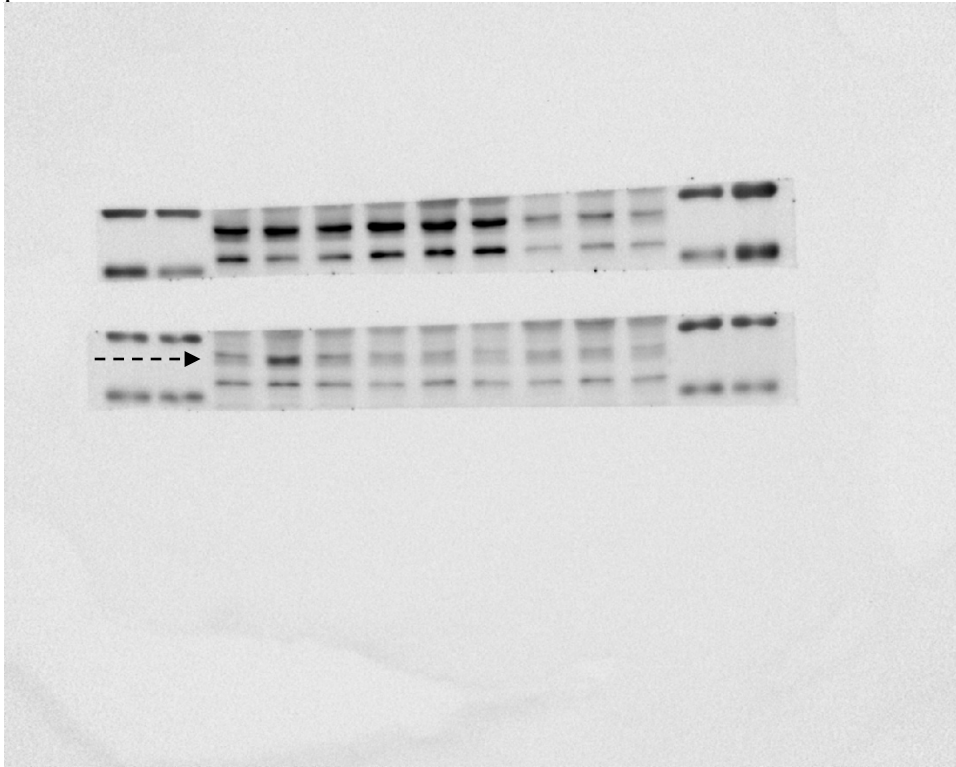

Total MEK:

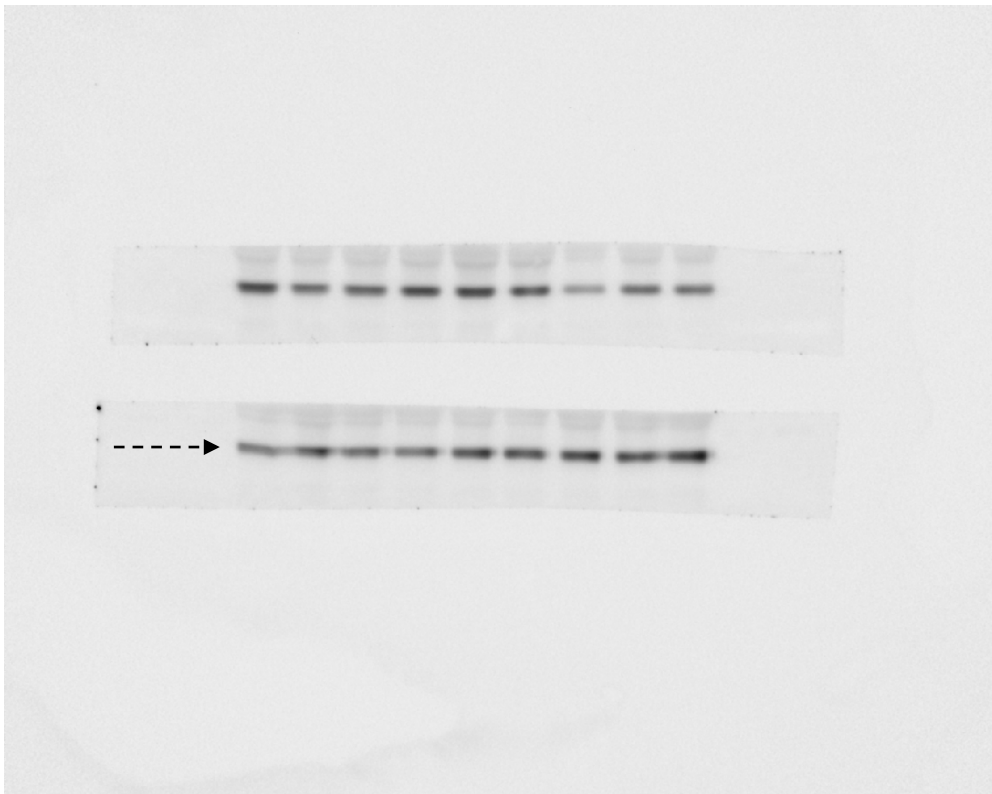

p-ERK:

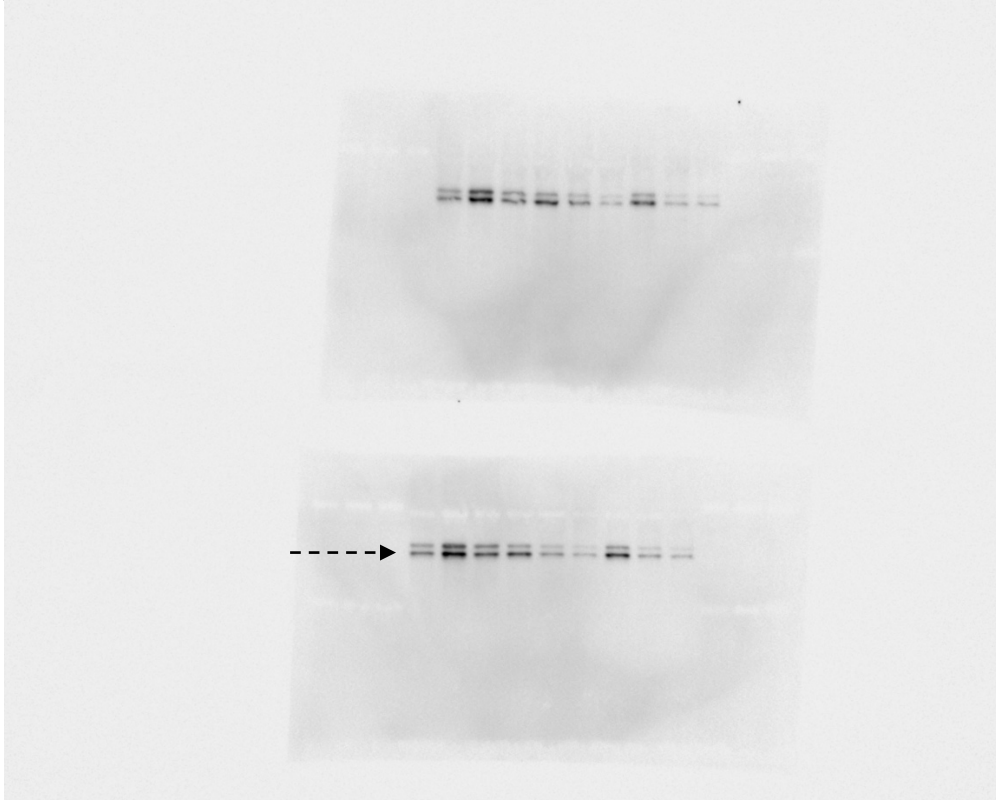

Total ERK:

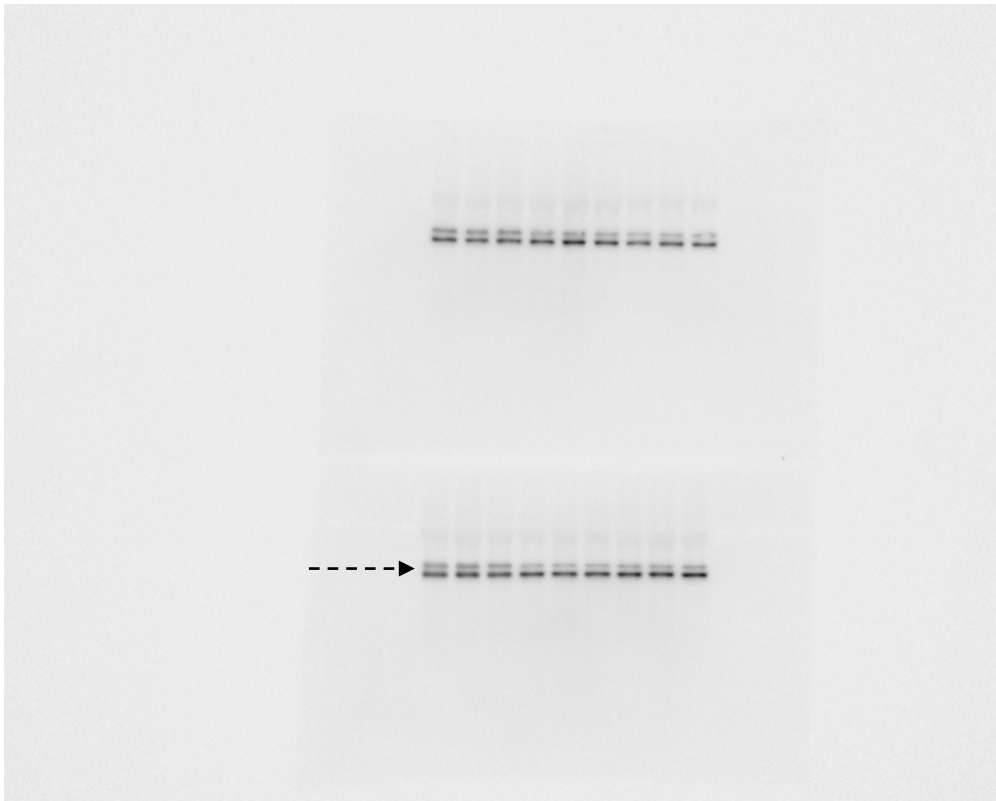

a-tubulin:

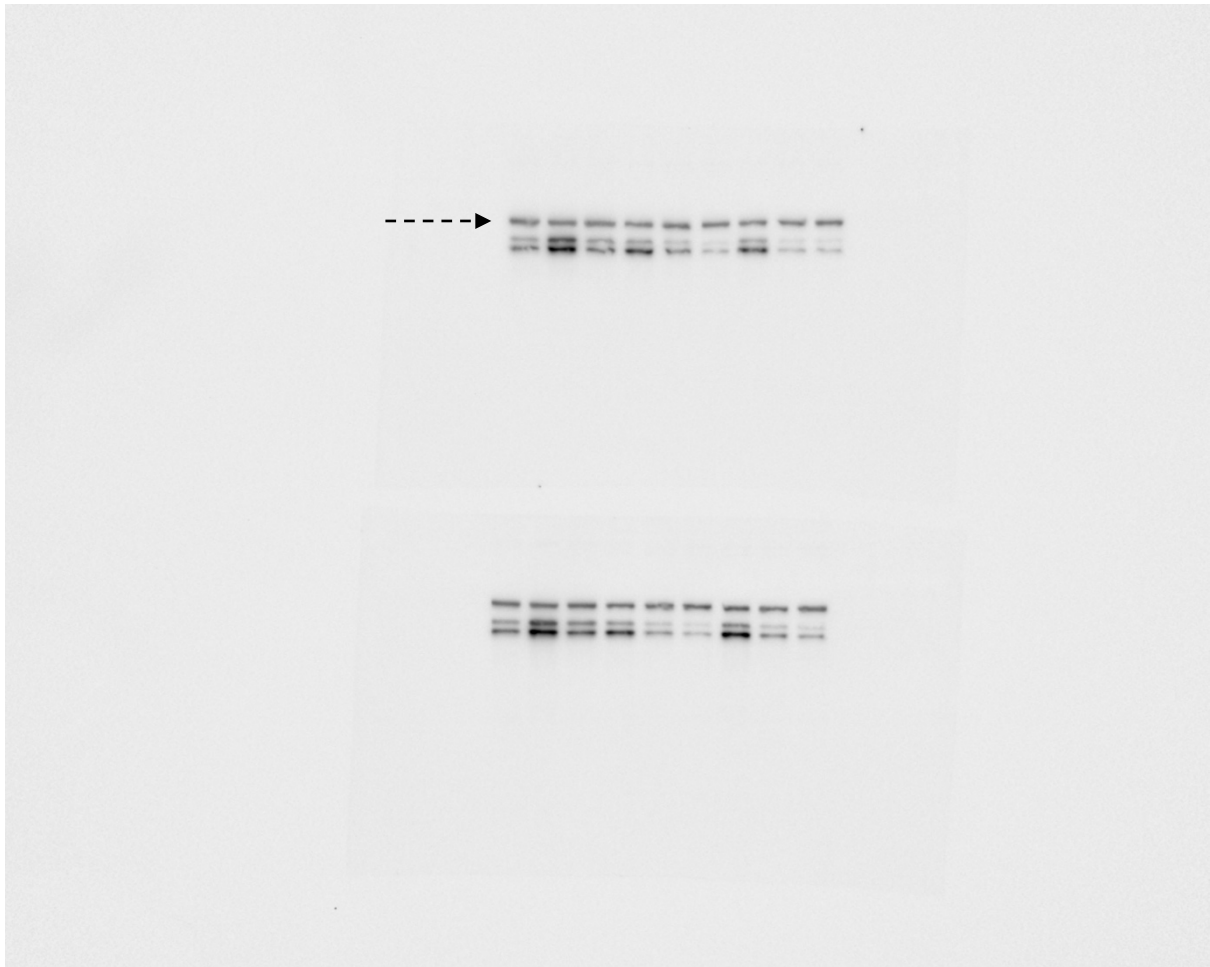

Supplement: 12964_2024_1844_MOESM1_ESM.pdf [file 12964_2024_1844_MOESM1_ESM.pdf]
