# Supplementary material for: Loss of mitochondrial Ca2+ response and CaMKII/ERK activation by LRRK2R1441G mutation correlate with impaired depolarization-induced mitophagy
Source: PubMed Central journal article supplement — Cell Commun Signal. 2024 Oct 10;22:485. doi: 10.1186/s12964-024-01844-y (PMC11465656; doi:10.1186/s12964-024-01844-y), 2024-10-10
Supplement: 12964_2024_1844_MOESM2_ESM.pdf [file 12964_2024_1844_MOESM2_ESM.pdf]

## Supplementary Information

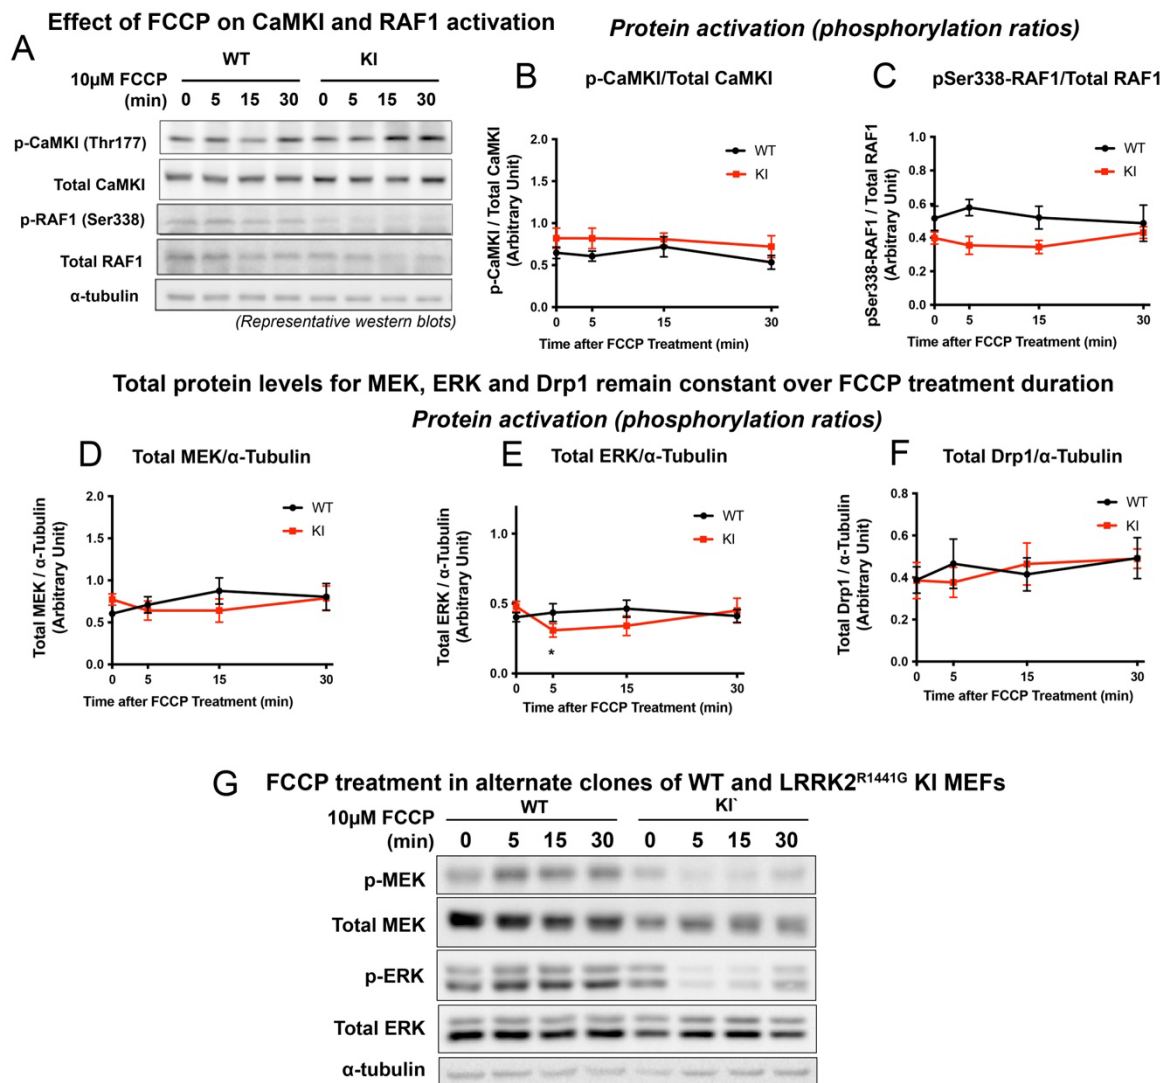

## Supplementary Fig. S1

(A) Representative immunoblots of WT and KI MEFs treated with FCCP for p-CaMKI (Thr177), total CaMKI, p-RAF1 (Ser338) and total RAF1, and  $\alpha$ -tubulin as a loading control. (B, C) FCCP did not induce phosphorylation of CaMKI and RAF1 in both cell lines. (D-F) Quantified total protein levels for MEK, ERK and Drp1 remain constant over the duration of FCCP treatment in both cell lines. (G) Representative western blots of alternate clones of WT and LRRK2<sup>R1441G</sup> KI MEFs treated with FCCP (10  $\mu$ M) for 0, 5, 15 and 30 min.

## 24 h pre-treatment with LRRK2 kinase inhibitor (MLi-2)

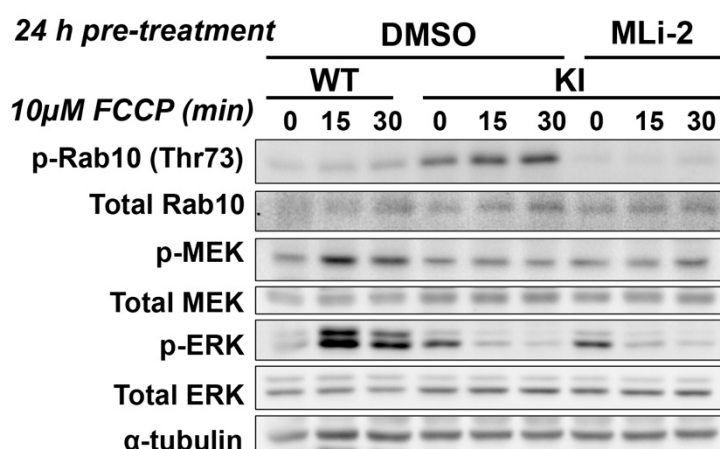

### Supplementary Fig. S2

Representative immunoblots of KI MEFs pre-treated with either LRRK2 kinase inhibitor, MLI-2 (30 nM), or vehicle, DMSO, for 24 h prior to FCCP treatment (10  $\mu$ M) for 0, 15 and 30 min (N=1). WT MEFs were pre-treated with DMSO as a positive control, followed by FCCP treatment of same duration. LRRK2 kinase inhibition by MLI-2 was confirmed by the reduction in p-Rab10 (Thr73) level. Both DMSO and MLI-2-treated KI MEFs lacked phosphorylation of MEK and ERK, unlike WT MEFs which showed clear phosphorylation of MEK and ERK at 15 and 30 min post FCCP treatment.
